# Supplementary material for: Characterization and Functional Analysis of 4-Coumarate:CoA Ligase Genes in Mulberry
Source: PubMed Central journal article supplement (PMC4877003; doi:10.1371/journal.pone.0155814), 2016-05-23
Supplement: pone.0155814.s002.pdf [file pone.0155814.s002.pdf]

| Rank | Protein Name                                | Accession No. | Protein MW | Protein PI | Pep. Count | Protein Score | Protein Score C. I. % | Intensity Matched | Total Ion Score | Total Ion C. I. % | Confirmed |
|------|---------------------------------------------|---------------|------------|------------|------------|---------------|-----------------------|-------------------|-----------------|-------------------|-----------|
| 1    | 4-coumarate--CoA ligase 3 [Morus notabilis] | gi 587838458  | 65230.9    | 6.05       | 14         | 617           | 100                   | 32.806            | 561             | 100               |           |

Peptide Information

| Calc. Mass | Obsrv. Mass | $\pm$ d | $\pm$ ppm | Start Seq. | End Seq. | Sequence                 | Ion Score | C. I. % | Modification              | Rank | Result Type |
|------------|-------------|---------|-----------|------------|----------|--------------------------|-----------|---------|---------------------------|------|-------------|
| 844.4523   | 844.4637    | 0.0114  | 13        | 368        | 374      | ELQDALR                  |           |         |                           |      | Mascot      |
| 1007.4761  | 1007.4838   | 0.0077  | 8         | 410        | 418      | LGSCGCVVR                |           |         | Carbamidomethyl (C) [4,6] |      | Mascot      |
| 1152.5896  | 1152.6001   | 0.0105  | 9         | 347        | 356      | VAEYDLSSIR               |           |         |                           |      | Mascot      |
| 1152.5896  | 1152.6001   | 0.0105  | 9         | 347        | 356      | VAEYDLSSIR               | 63        | 99.998  |                           |      | Mascot      |
| 1444.7432  | 1444.7574   | 0.0142  | 10        | 525        | 538      | DDAAGEVPVAFVVR           |           |         |                           |      | Mascot      |
| 1444.7432  | 1444.7574   | 0.0142  | 10        | 525        | 538      | DDAAGEVPVAFVVR           | 131       | 100     |                           |      | Mascot      |
| 1561.0088  | 1560.9777   | -0.0311 | -20       | 328        | 343      | VSIAAVVPLVLALAK          |           |         |                           |      | Mascot      |
| 1652.9482  | 1652.871    | -0.0772 | -47       | 314        | 327      | FEIGALLELVQKHR           |           |         |                           |      | Mascot      |
| 1837.9114  | 1837.9277   | 0.0163  | 9         | 59         | 75       | LSEFADRPCIISGSTGK        |           |         | Carbamidomethyl (C) [9]   |      | Mascot      |
| 1837.9114  | 1837.9277   | 0.0163  | 9         | 59         | 75       | LSEFADRPCIISGSTGK        | 75        | 100     | Carbamidomethyl (C) [9]   |      | Mascot      |
| 1973.0227  | 1973.0139   | -0.0088 | -4        | 231        | 250      | ISADDPVALPFSSGTTGLPK     |           |         |                           |      | Mascot      |
| 2273.1384  | 2273.1592   | 0.0208  | 9         | 40         | 58       | LPDITISNNIPLHAYCFER      |           |         | Carbamidomethyl (C) [16]  |      | Mascot      |
| 2305.113   | 2305.1296   | 0.0166  | 7         | 424        | 444      | VIDPETGSSLGYNQPGEICIR    |           |         | Carbamidomethyl (C) [19]  |      | Mascot      |
| 2305.113   | 2305.1296   | 0.0166  | 7         | 424        | 444      | VIDPETGSSLGYNQPGEICIR    | 171       | 100     | Carbamidomethyl (C) [19]  |      | Mascot      |
| 2397.2161  | 2397.2207   | 0.0046  | 2         | 183        | 202      | VITVDDPPEDCLHFWSLLLK     |           |         | Carbamidomethyl (C) [11]  |      | Mascot      |
| 2428.2251  | 2428.2163   | -0.0088 | -4        | 380        | 403      | AILGGYGMTEAGPVISM SLSFAK |           |         |                           |      | Mascot      |
| 2488.2654  | 2488.2815   | 0.0161  | 6         | 38         | 58       | SKLPDITISNNIPLHAYCFER    |           |         | Carbamidomethyl (C) [18]  |      | Mascot      |
| 2488.2654  | 2488.2815   | 0.0161  | 6         | 38         | 58       | SKLPDITISNNIPLHAYCFER    | 121       | 100     | Carbamidomethyl (C) [18]  |      | Mascot      |
| 2807.2588  | 2807.343    | 0.0842  | 30        | 207        | 230      | KTETIQDQSEEEEDDDQLLDAIK  |           |         |                           |      | Mascot      |
