# Supplementary material for: Characterization and Functional Analysis of 4-Coumarate:CoA Ligase Genes in Mulberry
Source: PLoS One. 2016 May 23;11(5):e0155814. doi: 10.1371/journal.pone.0155814 (PMC4877003; doi:10.1371/journal.pone.0155814)
Supplement: S2 Table — (DOCX) [file pone.0155814.s005.docx]

**S2 Table Primers for qRT-PCR in this study.**

| Gene | Primer (5' to 3') |
| --- | --- |
| *Ma4CL1* | Forward: AGGTTGATGGAGAGAATCCG |
| Reverse: CAGAGCAGGATCGAGTTGAG |
| *Ma4CL2* | Forward: AAGGAGCCCATGGAAGTAAA |
| Reverse: CTGATCGCCTCTAATGCAAA |
| *Ma4CL3* | Forward: TGGAGCTGGTACAGAAGCAC |
| Reverse: CGAATGGAGCTGAGATCGTA |
| *Ma4CL4* | Forward: ATTCTCTGCGTGCTTCCTTT |
| Reverse: AACTTGCCGATCTCAAACCT |
